# Supplementary material
Source: publisher figshare collection journal article supplement (https://acs.figshare.com/ndownloader/files/3765457)
Supplement: Supplementary file 1 [file 3765457]

1 Time-resolved investigation of cobalt oxidation by Mn(III)-rich  
2  $\delta$ -MnO<sub>2</sub> using quick X-ray absorption spectroscopy

3

4

5 Anna A. Simanova<sup>1</sup>, Jasquelin Peña<sup>1\*</sup>

6

7

8 <sup>1</sup> Institute of Earth Surface Dynamics, University of Lausanne, Switzerland

9

10

11 \* Corresponding author. E-mail: [jasquelin.pena@unil.ch](mailto:jasquelin.pena@unil.ch); Tel: +47216924355; 4879

12 Geopolis, UNIL-Mouline, CH-1015 Lausanne

13

14

15

16

SUPPORTING INFORMATION

17

18

(16 pages, 7 figures, 5 tables)

19

20

21

22

23

24

25

26

27

28

29

30

31

32

## SI Materials and methods.

**Pair distribution function analysis of high-energy X-ray scattering.** Pair distribution function (PDF) analysis was used to determine whether any changes in mineral structure were caused by the adsorption of  $\text{Co}^{2+}$  and incorporation of  $\text{Co}^{3+}$  into the  $\text{Mn}^{\text{III}}_{\delta}\text{-MnO}_2$  structure. Samples analyzed by PDF analysis were equilibrated for 48 hours and thus reflect structural changes incurred over longer reaction times than those investigated by QXAS ( $t < 12$  h). The PDFs were extracted from high-energy X-ray scattering data collected using X-rays of 58.65 keV ( $\lambda = 0.2114$  Å) on beam line 11-ID-B at the Advanced Photon Source, Argonne National Laboratory. Data were collected to  $Q$  values of  $29 \text{ Å}^{-1}$  at room temperature. The solids from 20 mL of a  $\text{Mn}^{\text{III}}_{\delta}\text{-MnO}_2$  suspension equilibrated with Co to achieve maximum surface loadings of 0, 0.05, or 0.20 mol Co mol<sup>-1</sup> Mn (**Table S1**) were obtained by filtration, air-dried overnight and packed into Kapton capillaries (inner diameter of 1 mm, Cole-Parmer); the capillaries were sealed on both ends using epoxy.

In the program Fit2D,<sup>1</sup> the 2D scattering patterns were first corrected for sample-to-detector distance and tilt angle of the detector relative to the beam path, then integrated and converted to 1D plots of the scattering intensity versus scattering angle,  $Q$ . In the program PDFgetX2,<sup>2</sup> the 1D plots were converted to the total structure function,  $S(Q)$ , and the PDF,  $G(R)$ , using standard correction and normalization procedures.<sup>3</sup> The chemical formulas used for data reduction were  $\text{Na}_{0.03}\text{MnO}_2 \cdot x\text{H}_2\text{O}$ ,  $\text{Co}_{0.04}\text{Na}_{0.03}\text{MnO}_2 \cdot x\text{H}_2\text{O}$ ,  $\text{Co}_{0.21}\text{Na}_{0.03}\text{MnO}_2 \cdot x\text{H}_2\text{O}$  for Co\_0.00, Co\_0.05 and Co\_0.20, respectively, where Na:Mn and Co:Mn molar ratios were obtained from chemical analysis of the solid by ICP-OES and the number of water molecules ( $x$ ) was varied

between 2 and 3 to minimize variations in the background signal between 0 – 1.5 Å<sup>-1</sup>. Differential PDFs (d-PDFs) were obtained by subtracting the PDF of Co<sub>0.00</sub> from Co<sub>0.05</sub> and Co<sub>0.20</sub> samples to identify changes in mineral structure induced by Co sorption.<sup>4-6</sup>

### **Effect of HEPES on Co uptake and Mn(II) release in Co-Mn<sup>III</sup>- $\delta$ -MnO<sub>2</sub>**

Due to the presence of a reducing piperazine-ring group, HEPES may interfere with Co-Mn redox processes by 1) generating additional Mn(III) by reducing Mn(IV), 2) generating Mn(II) by reducing Mn(III) or 3) sorbing and thus blocking reactive surface sites. To test the effect of the HEPES buffer on Co uptake and Mn release to solution, we performed complementary experiments where, prior to Co addition, the Mn<sup>III</sup>- $\delta$ -MnO<sub>2</sub> particles were filtered to remove all HEPES, rinsed with 10 mM NaCl and resuspended in 10 mM NaCl. In these experiments, a pH STAT (Metrohm) was used for pH-control. After 1-hour equilibration at pH 6.5, an aliquot of CoCl<sub>2</sub> solution was added to achieve a total Co concentration of 0.20 mol Co mol<sup>-1</sup> Mn. Samples were withdrawn as a function of time to analyze for the total and aqueous concentrations of Co and Mn. In addition, we measured AMON values (potentiometric titrations) and Mn(III) content (pyrophosphate extractions) in the HEPES-reacted  $\delta$ -MnO<sub>2</sub> as a function of time in the absence of Co.

In the absence of Co, we found that the Mn(III) content of the Mn oxide reached 31 % within 1 h of the reaction of  $\delta$ -MnO<sub>2</sub> with HEPES and increased only slightly (to 35 %) from 1 h to 48 h. By 48 h of the reaction, around 1 % of the Mn initially in the solid was accumulated in solution as Mn(II). Our previous study showed that equilibration of  $\delta$ -MnO<sub>2</sub> with HEPES under these experimental conditions does not trigger any phase

transformation.<sup>7</sup> These observations suggest that HEPES has a diminished effect on Mn(III) generation as the mineral approaches the maximum amount of Mn(III) it can accommodate.<sup>8</sup>

Our experiments in the presence of Co showed no difference in Co uptake and Mn release kinetics at  $t < 100$  min in the presence and absence of HEPES (Figure S3), but slightly greater Mn release in the presence of HEPES at  $t > 100$  min (8 % vs. 5 %). Since the extent of Co sorption by  $\text{Mn}^{\text{III}}_{\delta}\text{-MnO}_2$  is the same in the presence and absence of HEPES, we do not expect significant amounts of HEPES to accumulate at the surface and compete with Co for the same surface sites. Unmodified kinetics and extent of Co uptake even with an initial 10-fold excess of HEPES also indicates that cobalt must have a significantly greater affinity/reactivity towards the mineral. In addition, the similarity in the kinetics and extent of Mn(II) accumulation in solution with and without HEPES during first 100 min corroborates that aqueous Mn(II) originates from sorption/redox reactions between Co and the mineral. This conclusion is also consistent with the fact that the addition of Co triggers 5-8 % of the total Mn initially in the solid phase accumulated in solution as Mn(II), compared to about 1 % Mn released in the absence of Co after 48 h of reaction with HEPES.<sup>7</sup> However, from 100 min to 48 h, slightly more Mn(II) was released in Co- $\text{Mn}^{\text{III}}_{\delta}\text{-MnO}_2$  experiments the presence of HEPES (8 % at 48 h) than in its absence (5% at 48 h).

Assuming that significant changes in the mechanism of Co sorption and oxidation by  $\text{Mn}(\text{III})_{\delta}\text{-MnO}_2$  would lead to different reaction kinetics, we conclude that HEPES does not influence the Co uptake mechanism at  $t < 100$  min, but may have a small influence at  $t > 100$  min. Slightly higher Mn release at  $t > 100$  min may be consistent

with i) HEPES consumption of Mn(III); ii) disproportionation of Mn(III) atoms, where Mn(III) could originate from Co or HEPES oxidation coupled to Mn(IV) reduction; 3) slow desorption of adsorbed Mn(II), where Mn(II) could originate from Co or HEPES oxidation coupled to Mn(III) reduction. Due to the plethora of processes, we cannot ascertain whether the slight increase in Mn release at reaction times greater than 100 min is due to redox processes involving Co, HEPES or both Co and HEPES.

## SI Figures

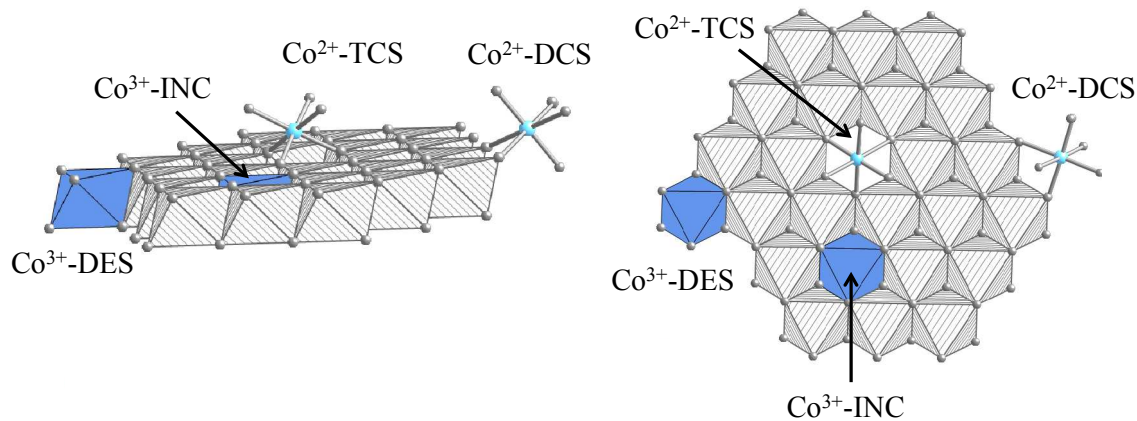

**Figure S1.** Schematic representations of Co-MnO<sub>2</sub> surface complexes (left - side view, right – top view): Co<sup>2+</sup> = light blue, Co<sup>3+</sup> = dark blue, Mn octahedra = hatched, O = grey.

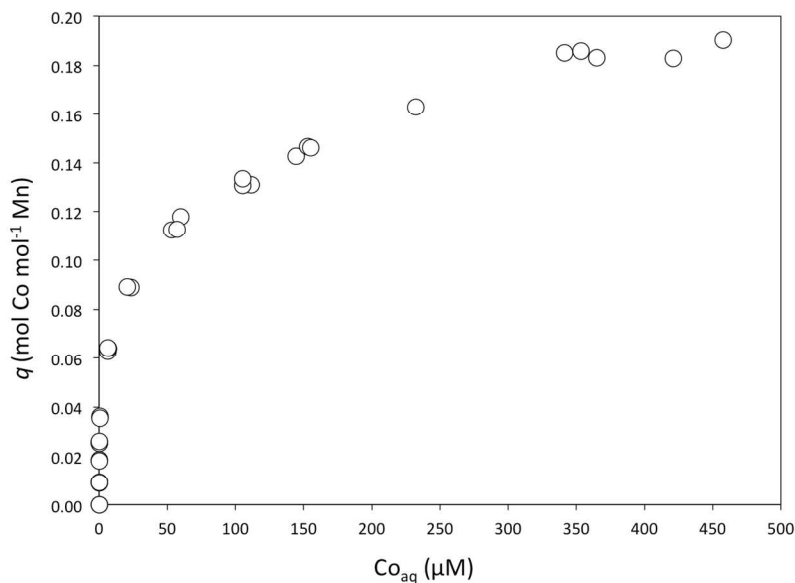

**Figure S2.** Sorption isotherm of Co on Mn<sup>III</sup><sub>δ</sub>-MnO<sub>2</sub> measured at pH 6.5 after 48 h of equilibration following the experimental procedure described in the main manuscript text.

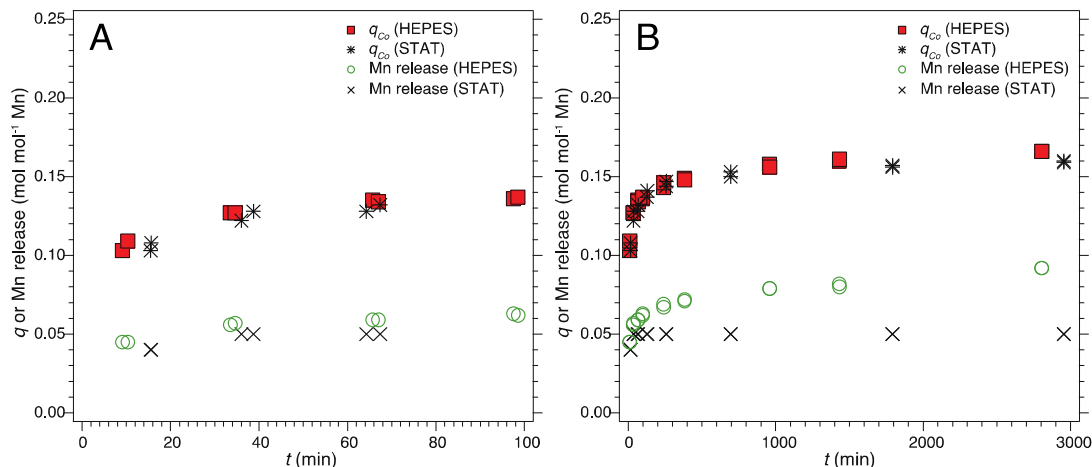

**Figure S3.** Batch kinetic data obtained for Co sorption and Mn release in  $\text{Mn}^{\text{III}}_{\delta}\text{-MnO}_2$  suspension at total Co concentration of  $0.20 \text{ mol Co mol}^{-1} \text{ Mn}$  at pH 6.5 in the presence and absence of 10 mM HEPES (pH maintained with STAT) during first 100 min (A) and during 3000 min (B).

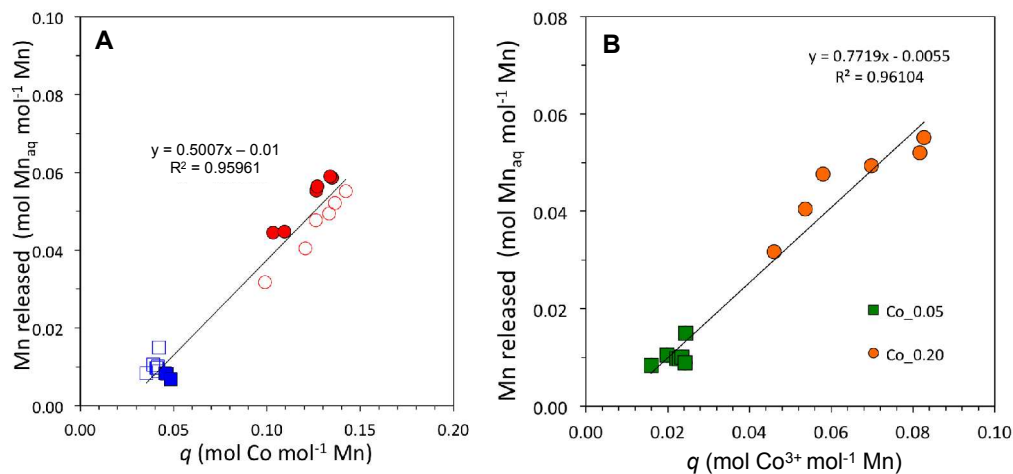

**Figure S4.** (A) Plot of Mn released against Co surface excess ( $q$ ) measured in batch kinetic (filled symbols) and QXAS (empty symbols) experiments in Co\_0.05 (squares) and Co\_0.20 (circles) experiments at  $t < 30 \text{ min}$ . (B) Plot of Mn released against  $\text{Co}^{3+}$  surface excess in Co\_0.05 and Co\_0.20 experiments at  $t < 30 \text{ min}$ .

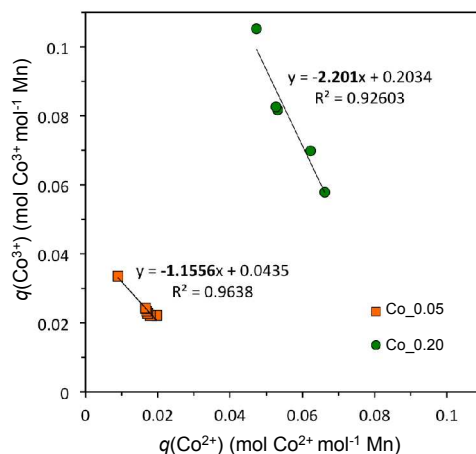

**Figure S5.** Plots of the  $\text{Co}^{3+}$  surface excess against the  $\text{Co}^{2+}$  surface excess in Co\_0.05 and Co\_0.20 at reaction times between 20 min and 12 h. The linear correlations show that in Co 0.05  $\Delta q(\text{Co}^{3+})/\Delta q(\text{Co}^{2+})$  is close to -1, while in Co 0.20  $\Delta q(\text{Co}^{3+})/\Delta q(\text{Co}^{2+})$  is close to -2.



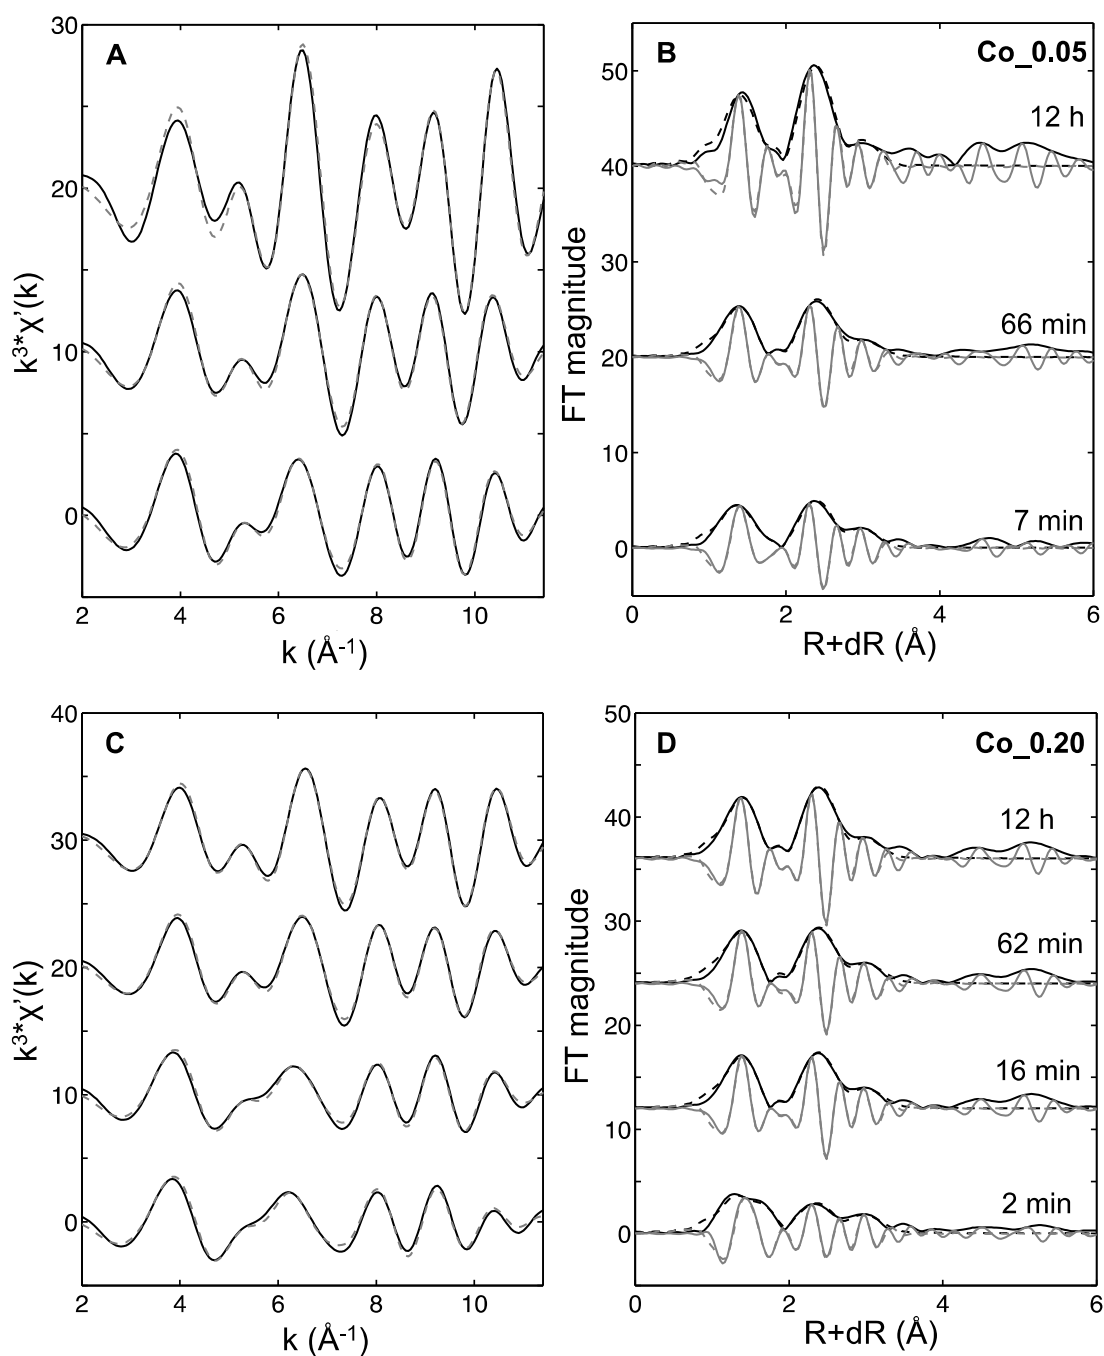

**Figure S6.** Back Fourier-transforms taken from 1-3.3 Å (left) and magnitude and imaginary parts of the Fourier-transforms (right) of the Co K-edge EXAFS spectra for Co<sub>0.05</sub> (A and B) and Co<sub>0.20</sub> (C and D) plotted with best-fit curves (dashed lines)

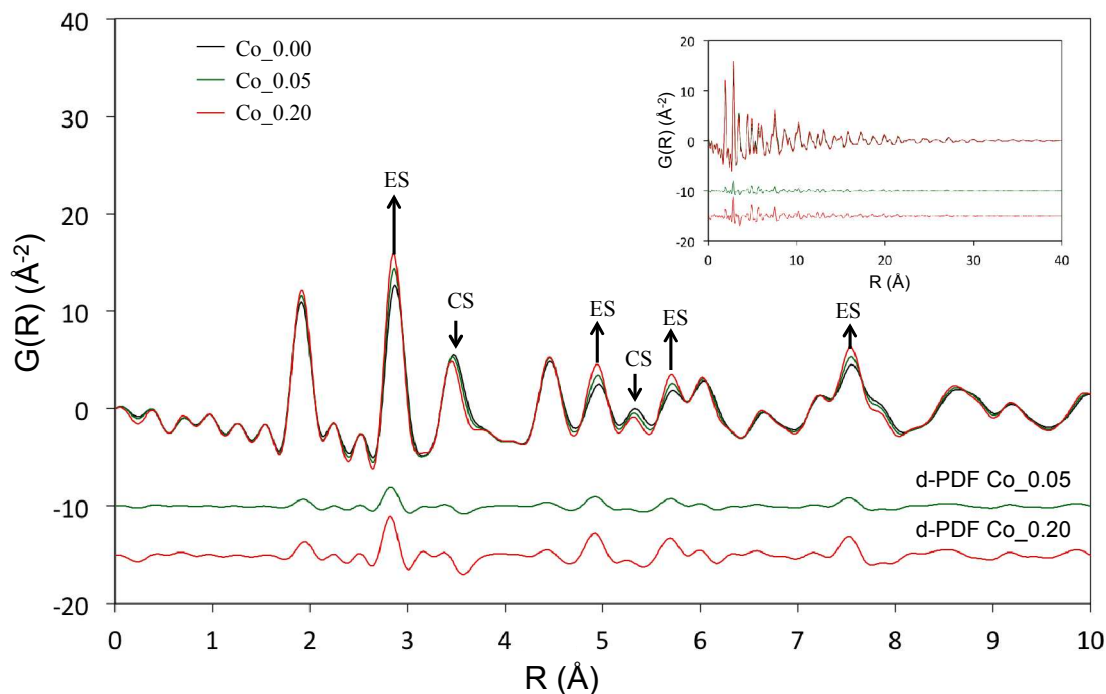

**Figure S7.** PDFs  $\text{Co}_{0.00}$ ,  $\text{Co}_{0.05}$ , and  $\text{Co}_{0.20}$ . The arrows indicate differences in the spectra observed as a function of the Co loading. Peaks were assigned based on the work by Manceau et al.<sup>8</sup>; “CS” denotes corner-sharing linkages between Me(layer)–Me(interlayer) pairs, “ES” denotes edge-sharing linkages between Me(layer)–Me(layer) pairs. Differential PDFs obtained by subtracting the PDF of  $\text{Co}_{0.00}$  from the PDFs of  $\text{Co}_{0.05}$  and  $\text{Co}_{0.20}$  are shown at the bottom of the figure. The inset shows the PDFs extended to up to 40  $\text{\AA}$ .

**Table S1.** Description of samples obtained from batch kinetic, QXAS and PDF measurements.

|                      | time   | pH   | $c_{\text{MnTOT}}, \mu\text{M}$ | $c_{\text{CoTOT}}, \mu\text{M}$ | $c_{\text{Mn}}, \mu\text{M}^{\text{a}}$ | $c_{\text{Co}}, \mu\text{M}$ | $q_{\text{max}}^{\text{b}}$ | $q^{\text{c}}$ | Mn release <sup>d</sup> |
|----------------------|--------|------|---------------------------------|---------------------------------|-----------------------------------------|------------------------------|-----------------------------|----------------|-------------------------|
| <b>Batch kinetic</b> |        |      |                                 |                                 |                                         |                              |                             |                |                         |
| Co_0.00              | 10 min | 6.68 | 4474.97                         | -                               | 1.2                                     | -                            | -                           | -              | 0.000                   |
|                      | 48 h   |      |                                 |                                 | 58.67                                   |                              |                             |                | 0.013                   |
| Co_0.05              | 10 min | 6.69 | 4578.46                         | 235.4                           | 37.8                                    | 26.06                        | 0.05                        | 0.05           | 0.008                   |
|                      | 48 h   |      |                                 |                                 | 121.84                                  | 1.35                         | 0.05                        | 0.05           | 0.027                   |
| Co_0.20              | 10 min | 6.35 | 5121.48                         | 1008.53                         | 228.01                                  | 473.02                       | 0.20                        | 0.11           | 0.045                   |
|                      | 48 h   |      |                                 |                                 | 471.18                                  | 235.91                       | 0.20                        | 0.17           | 0.092                   |
| <b>QXAS samples</b>  |        |      |                                 |                                 |                                         |                              |                             |                |                         |
| Co_0.05              | 12 h   | 6.74 | 8501.80                         | 365.27                          | 127.36                                  | 13.70                        | 0.04                        | 0.04           | 0.02                    |
| Co_0.20              | 12 h   | 6.67 | 6914.93                         | 1257.93                         | 402.74                                  | 260.17                       | 0.18                        | 0.15           | 0.06                    |
| <b>PDF samples</b>   |        |      |                                 |                                 |                                         |                              |                             |                |                         |
| Co_0.00              | 48 h   | 6.81 | 7495.03                         | -                               | 64.92                                   | -                            | -                           | -              | 0.01                    |
| Co_0.05              | 48 h   | 6.34 | 6601.47                         | 268.13                          | 131.20                                  | 1.38                         | 0.04                        | 0.04           | 0.02                    |
| Co_0.20              | 48 h   | 6.30 | 6602.00                         | 1519.13                         | 505.43                                  | 224.35                       | 0.23                        | 0.21           | 0.08                    |

<sup>a</sup> the concentrations of aqueous Mn in Co 0.05 and Co 0.20 are not corrected to the concentrations of aqueous Mn in the blank experiment (Co 0.00)

<sup>b</sup>  $q_{\text{max}}$  is the theoretical maximum surface loading of Co that was calculated as  $c_{\text{CoTOT}}/c_{\text{MnTOT}}$

<sup>c</sup>  $q$  is the amount of Co sorbed per mol Mn and was calculated as  $(c_{\text{CoTOT}} - c_{\text{Co}})/(c_{\text{MnTOT}} - c_{\text{Mn}})$

<sup>d</sup> Mn release was calculated as  $c_{\text{Mnaq}}/c_{\text{MnTOT}}$  and has units of mol Mn<sub>aq</sub> mol<sup>-1</sup> Mn. Note that values for the Mn release in Co 0.05 and Co 0.20 are not corrected to the values of the Mn release in the blank experiment (Co 0.00)

207 **Table S2.** LCF results, where  $f$  is the fraction of  $\text{Co}^{2+}$  and  $(1-f)$  is the fraction of  $\text{Co}^{3+}$ .

|                      | $t$ ,<br>min | $q$   | $f$               | $1-f$             | Comp<br>Sum | $q$ ( $\text{Co}^{2+}$ ) | $q$ ( $\text{Co}^{3+}$ ) |
|----------------------|--------------|-------|-------------------|-------------------|-------------|--------------------------|--------------------------|
| Co_0.05 <sup>a</sup> | 2            | 0.035 | 0.53 <sup>b</sup> | 0.45 <sup>b</sup> | 0.98        | 0.019                    | 0.016                    |
|                      | 7            | 0.039 | 0.47              | 0.51              | 0.98        | 0.018                    | 0.020                    |
|                      | 15           | 0.043 | 0.46              | 0.52              | 0.98        | 0.020                    | 0.022                    |
|                      | 21           | 0.041 | 0.44              | 0.54              | 0.98        | 0.018                    | 0.022                    |
|                      | 28           | 0.041 | 0.42              | 0.56              | 0.98        | 0.017                    | 0.023                    |
|                      | 36           | 0.042 | 0.41              | 0.57              | 0.98        | 0.017                    | 0.024                    |
|                      | 49           | 0.042 | 0.40              | 0.58              | 0.98        | 0.017                    | 0.024                    |
|                      | 66           | 0.042 | 0.40              | 0.58              | 0.98        | 0.017                    | 0.024                    |
|                      | 720          | 0.043 | 0.21              | 0.80              | 1.01        | 0.009                    | 0.034                    |
| Co_0.20 <sup>a</sup> | 2            | 0.099 | 0.53              | 0.46              | 0.99        | 0.052                    | 0.046                    |
|                      | 8            | 0.121 | 0.54              | 0.45              | 0.99        | 0.065                    | 0.054                    |
|                      | 16           | 0.126 | 0.52              | 0.46              | 0.98        | 0.066                    | 0.058                    |
|                      | 25           | 0.133 | 0.47              | 0.52              | 0.99        | 0.063                    | 0.069                    |
|                      | 35           | 0.136 | 0.39              | 0.60              | 0.99        | 0.053                    | 0.082                    |
|                      | 62           | 0.142 | 0.37              | 0.58              | 0.95        | 0.053                    | 0.082                    |
|                      | 720          | 0.153 | 0.31              | 0.69              | 1.00        | 0.047                    | 0.106                    |

<sup>a</sup> For all samples the reduced  $\chi^2$  values ranged 0.0003 – 0.0024

<sup>b</sup> Uncertainties for  $f$  for all samples were in a range 0.002 – 0.005

**Table S3.** Structural parameters for Co<sub>0.05</sub> on Mn<sup>III</sup><sub>δ</sub>-MnO<sub>2</sub>.

| Sample             | Shell ID                           | $A^a$                                                  | $R$ , Å   | $\sigma^2$ , Å <sup>2</sup> | $\Delta E_{\theta}$ , eV | Red $\chi^2$ | R-factor | $CN(\text{Co}^{3+}\text{-Mn}^{\text{ES}})$ | $CN(\text{Co}^{2+}\text{-Mn}^{\text{CS}})$ |
|--------------------|------------------------------------|--------------------------------------------------------|-----------|-----------------------------|--------------------------|--------------|----------|--------------------------------------------|--------------------------------------------|
| Co <sub>0.05</sub> | Co <sup>3+</sup> -O                | $6 \cdot (1-f)$                                        | 1.91±0.01 | 0.0050±0.0010               | -9.7±1.1                 | 0.00         | 0.0157   |                                            |                                            |
| 7 min              | Co <sup>2+</sup> -O                | $6 \cdot f$                                            | 2.08±0.01 | 0.0052±0.0014               |                          |              |          |                                            |                                            |
|                    | Co <sup>3+</sup> -Mn <sup>ES</sup> | $CN(\text{Co}^{3+}\text{-Mn}^{\text{ES}}) \cdot (1-f)$ | 2.84±0.01 | 0.0025±0.0010               |                          |              |          | 3.12±0.49                                  |                                            |
|                    | Co <sup>2+</sup> -Mn <sup>CS</sup> | $CN(\text{Co}^{2+}\text{-Mn}^{\text{CS}}) \cdot f$     | 3.48±0.01 | 0.004 <sup>b</sup>          |                          |              |          |                                            | 2.71±0.43                                  |
| Co <sub>0.05</sub> | Co <sup>3+</sup> -O                | $6 \cdot (1-f)$                                        | 1.92±0.01 | 0.0049±0.0009               | -8.7±1.0                 | 0.02         | 0.0132   |                                            |                                            |
| 66 min             | Co <sup>2+</sup> -O                | $6 \cdot f$                                            | 2.10±0.02 | 0.0081±0.0025               |                          |              |          |                                            |                                            |
|                    | Co <sup>3+</sup> -Mn <sup>ES</sup> | $CN(\text{Co}^{3+}\text{-Mn}^{\text{ES}}) \cdot (1-f)$ | 2.85±0.01 | 0.0035±0.0010               |                          |              |          | 3.84±0.52                                  |                                            |
|                    | Co <sup>2+</sup> -Mn <sup>CS</sup> | $CN(\text{Co}^{2+}\text{-Mn}^{\text{CS}}) \cdot f$     | 3.50±0.01 | 0.004                       |                          |              |          |                                            | 2.90±0.55                                  |
| Co <sub>0.05</sub> | Co <sup>3+</sup> -O                | $6 \cdot (1-f)$                                        | 1.91±0.01 | 0.0037±0.0008               | -11.5±1.4                | 20.41        | 0.0203   |                                            |                                            |
| 12 h               | Co <sup>2+</sup> -O                | $6 \cdot f$                                            | 2.12±0.03 | 0.0040±0.0041               |                          |              |          |                                            |                                            |
|                    | Co <sup>3+</sup> -Mn <sup>ES</sup> | $CN(\text{Co}^{3+}\text{-Mn}^{\text{ES}}) \cdot (1-f)$ | 2.84±0.01 | 0.0022±0.0009               |                          |              |          | 4.13±0.62                                  |                                            |
|                    | Co <sup>2+</sup> -Mn <sup>CS</sup> | $CN(\text{Co}^{2+}\text{-Mn}^{\text{CS}}) \cdot f$     | 3.43±0.02 | 0.004                       |                          |              |          |                                            | 5.39±1.76                                  |
| Nind/Nvar          |                                    |                                                        | 19/10     |                             |                          |              |          |                                            |                                            |

<sup>a</sup>  $A$  denotes the amplitude of the corresponding shell, which equals the coordination number ( $CN$ ) scaled by the fraction of Co<sup>2+</sup> ( $f$ ) and Co<sup>3+</sup> ( $1-f$ ) that was obtained by LCF fitting of the QXANES spectra (**Table S2**). The coordination numbers of Co-O shells were fixed to 6, while the coordination numbers of Co-Mn shells [ $CN(\text{Co}^{3+}\text{-Mn}^{\text{ES}})$  and  $CN(\text{Co}^{2+}\text{-Mn}^{\text{CS}})$ ] were floated

<sup>b</sup> The Debye-Waller factor was fixed to the value reported previously.<sup>9</sup>

**Table S4.** Structural parameters for Co<sub>0.20</sub> on Mn<sup>III</sup><sub>1- $\delta$</sub> -MnO<sub>2</sub>.

| Sample             | Shell ID                           | $A^a$                                                  | $R$ , Å   | $\sigma^2$ , Å <sup>2</sup> | $\Delta E_0$ , eV | Red $\chi^2$ | R-factor | $CN(\text{Co}^{3+}\text{-Mn}^{\text{ES}})$ | $CN(\text{Co}^{2+}\text{-Mn}^{\text{CS}})$ |
|--------------------|------------------------------------|--------------------------------------------------------|-----------|-----------------------------|-------------------|--------------|----------|--------------------------------------------|--------------------------------------------|
| Co <sub>0.20</sub> | Co <sup>3+</sup> -O                | $6 \cdot (1-f)$                                        | 1.91±0.01 | 0.0075±0.0018               | -10.9±1.6         | 0.11         | 0.0367   |                                            |                                            |
| 2 min              | Co <sup>2+</sup> -O                | $6 \cdot f$                                            | 2.08±0.01 | 0.0041±0.0012               |                   |              |          |                                            |                                            |
|                    | Co <sup>3+</sup> -Mn <sup>ES</sup> | $CN(\text{Co}^{3+}\text{-Mn}^{\text{ES}}) \cdot (1-f)$ | 2.83±0.01 | 0.0033±0.0021               |                   |              |          | 2.37±0.75                                  |                                            |
|                    | Co <sup>2+</sup> -Mn <sup>CS</sup> | $CN(\text{Co}^{2+}\text{-Mn}^{\text{CS}}) \cdot f$     | 3.48±0.02 | 0.004 <sup>b</sup>          |                   |              |          |                                            | 2.21±0.47                                  |
| Co <sub>0.20</sub> | Co <sup>3+</sup> -O                | $6 \cdot (1-f)$                                        | 1.91±0.01 | 0.0052±0.0011               | -9.9±1.4          | 0.05         | 0.0279   |                                            |                                            |
| 16 min             | Co <sup>2+</sup> -O                | $6 \cdot f$                                            | 2.09±0.01 | 0.0054±0.0013               |                   |              |          |                                            |                                            |
|                    | Co <sup>3+</sup> -Mn <sup>ES</sup> | $CN(\text{Co}^{3+}\text{-Mn}^{\text{ES}}) \cdot (1-f)$ | 2.84±0.01 | 0.0020±0.0015               |                   |              |          | 2.34±0.55                                  |                                            |
|                    | Co <sup>2+</sup> -Mn <sup>CS</sup> | $CN(\text{Co}^{2+}\text{-Mn}^{\text{CS}}) \cdot f$     | 3.49±0.01 | 0.004                       |                   |              |          |                                            | 2.14±0.42                                  |
| Co <sub>0.20</sub> | Co <sup>3+</sup> -O                | $6 \cdot (1-f)$                                        | 1.92±0.01 | 0.0053±0.0008               | -9.2±0.9          | 0.06         | 0.0117   |                                            |                                            |
| 62 min             | Co <sup>2+</sup> -O                | $6 \cdot f$                                            | 2.10±0.01 | 0.0070±0.0019               |                   |              |          |                                            |                                            |
|                    | Co <sup>3+</sup> -Mn <sup>ES</sup> | $CN(\text{Co}^{3+}\text{-Mn}^{\text{ES}}) \cdot (1-f)$ | 2.84±0.01 | 0.0040±0.0009               |                   |              |          | 3.57±0.47                                  |                                            |
|                    | Co <sup>2+</sup> -Mn <sup>CS</sup> | $CN(\text{Co}^{2+}\text{-Mn}^{\text{CS}}) \cdot f$     | 3.49±0.01 | 0.004                       |                   |              |          |                                            | 3.25±0.48                                  |
| Co <sub>0.20</sub> | Co <sup>3+</sup> -O                | $6 \cdot (1-f)$                                        | 1.91±0.01 | 0.0048±0.0006               | -8.8±0.8          | 2.44         | 0.0088   |                                            |                                            |
| 12 h               | Co <sup>2+</sup> -O                | $6 \cdot f$                                            | 2.11±0.02 | 0.0072±0.0022               |                   |              |          |                                            |                                            |
|                    | Co <sup>3+</sup> -Mn <sup>ES</sup> | $CN(\text{Co}^{3+}\text{-Mn}^{\text{ES}}) \cdot (1-f)$ | 2.83±0.01 | 0.0032±0.0007               |                   |              |          | 3.70±0.41                                  |                                            |
|                    | Co <sup>2+</sup> -Mn <sup>CS</sup> | $CN(\text{Co}^{2+}\text{-Mn}^{\text{CS}}) \cdot f$     | 3.47±0.01 | 0.004                       |                   |              |          |                                            | 3.73±0.59                                  |
| Nind/Nvar          |                                    | 19/10                                                  |           |                             |                   |              |          |                                            |                                            |

<sup>a</sup>  $A$  denotes the amplitude of the corresponding shell, which equals the coordination number ( $CN$ ) scaled by the fraction of Co<sup>2+</sup> ( $f$ ) and Co<sup>3+</sup> ( $1-f$ ) that was obtained by LCF fitting of the QXANES spectra (**Table S2**). The coordination numbers of Co-O shells were fixed to 6, while the coordination numbers of Co-Mn shells [ $CN(\text{Co}^{3+}\text{-Mn}^{\text{ES}})$  and  $CN(\text{Co}^{2+}\text{-Mn}^{\text{CS}})$ ] were floated

<sup>b</sup> The Debye-Waller factor was fixed to the value reported previously.<sup>9</sup>

**Table S5.** Changes in Co<sup>2+</sup> and Co<sup>3+</sup> surface speciation at the surface of Mn<sup>III</sup><sub>δ</sub>-MnO<sub>2</sub> as a function of time in Co<sub>0.05</sub> and Co<sub>0.20</sub>.

|                    | t,<br>min | $q$ (Co <sup>2+</sup> -<br>DCS) <sup>a</sup> | $q$ (Co <sup>2,3+</sup> -<br>TCS) | error <sup>b</sup> in<br>$q$ (Co <sup>2,3+</sup> -CS) | $q$ (Co <sup>3+</sup> -<br>DES) | $q$ (Co <sup>3+</sup> -<br>INC) | error in<br>$q$ (Co <sup>3+</sup> -ES) |
|--------------------|-----------|----------------------------------------------|-----------------------------------|-------------------------------------------------------|---------------------------------|---------------------------------|----------------------------------------|
| Co <sub>0.05</sub> | 7         | 0.015                                        | 0.003                             | ±0.002                                                | 0.014                           | 0.006                           | ±0.002                                 |
|                    | 66        | 0.013                                        | 0.004                             | ±0.002                                                | 0.013                           | 0.011                           | ±0.003                                 |
|                    | 720       | nd                                           | 0.008                             | ±0.004                                                | 0.016                           | 0.018                           | ±0.005                                 |
| Co <sub>0.20</sub> | 2         | 0.052                                        | nd                                | ±0.003                                                | 0.042                           | nd                              | ±0.009                                 |
|                    | 16        | 0.066                                        | nd                                | ±0.005                                                | 0.053                           | nd                              | ±0.008                                 |
|                    | 62        | 0.037                                        | 0.017                             | ±0.006                                                | 0.050                           | 0.032                           | ±0.010                                 |
|                    | 720       | 0.027                                        | 0.020                             | ±0.007                                                | 0.061                           | 0.045                           | ±0.011                                 |

<sup>a</sup> Surface excess of the various Co surface species estimated as the product of the Co surface loading ( $q$ ), the fractions of Co<sup>2+</sup> and Co<sup>3+</sup> obtained from the LCF-QXANES (**Table S2**) and the CNs of the corresponding Co-Mn shells obtained from shell-by-shell fitting to the QEXAFS spectra (**Tables S3** and **S4**)

<sup>b</sup> Uncertainty in the surface excesses of the CS and ES geometries were estimated based on the uncertainty in the CNs of the corresponding Co-Mn shells (**Tables S3** and **S4**)

<sup>c</sup> nd = not detected, i.e. the estimated surface excess was lower than the uncertainty

## References

- (1) Hammersley, A. P.; Svensson, S. O.; Hanfland, M.; Fitch, A. N.; Hausermann, D., Two-dimensional detector software: From real detector to idealised image or two-theta scan. *High Pressure Research* **1996**, *14*, (4-6), 235-248.
- (2) Farrow, C. L.; Juhas, P.; Liu, J. W.; Bryndin, D.; Bozin, E. S.; Bloch, J.; Proffen, T.; Billinge, S. J. L., PDFfit2 and PDFgui: computer programs for studying nanostructure in crystals. *Journal of Physics-Condensed Matter* **2007**, *19*, (33), 335219.
- (3) Chupas, P. J.; Qiu, X.; Hanson, J. C.; Lee, P. L.; Grey, C. P.; Billinge, S. J. L., Rapid-acquisition pair distribution function (RA-PDF) analysis. *Journal of Applied Crystallography* **2003**, *36*, (6), 1342-1347.
- (4) Harrington, R.; Hausner, D. B.; Bhandari, N.; Strongin, D. R.; Chapman, K. W.; Chupas, P. J.; Middlemiss, D. S.; Grey, C. P.; Parise, J. B., Investigation of surface structures by powder diffraction: a differential pair distribution Function study on arsenate sorption on ferrihydrite. *Inorg. Chem.* **2010**, *49*, (1), 325-330.
- (5) Li, W.; Harrington, R.; Tang, Y. Z.; Kubicki, J. D.; Aryanpour, M.; Reeder, R. J.; Parise, J. B.; Phillips, B. L., Differential pair distribution function study of the structure of arsenate adsorbed on nanocrystalline gamma-alumina. *Environ. Sci. Technol.* **2011**, *45*, (22), 9687-9692.
- (6) Wang, X. M.; Li, W.; Harrington, R.; Liu, F.; Parise, J. B.; Feng, X. H.; Sparks, D. L., Effect of ferrihydrite crystallite size on phosphate adsorption reactivity. *Environ. Sci. Technol.* **2013**, *47*, (18), 10322-10331.

- (7) Simanova, A. A.; Kwon, K. D.; Bone, S. E.; Bargar, J. R.; Refson, K.; Sposito, G.; Peña, J., Probing the sorption reactivity of the edge surfaces in birnessite nanoparticles using nickel(II). *Geochim. Cosmochim. Acta* **2015**, *164*, (0), 191-204.
- (8) Manceau, A.; Marcus, M. A.; Grangeon, S.; Lanson, M.; Lanson, B.; Gaillot, A. C.; Skanthakumar, S.; Soderholm, L., Short-range and long-range order of phyllomanganate nanoparticles determined using high-energy X-ray scattering. *Journal of Applied Crystallography* **2013**, *46*, (1), 193-209.
- (9) Manceau, A.; Drits, V. A.; Silvester, E.; Bartoli, C.; Lanson, B., Structural mechanism of  $\text{Co}^{2+}$  oxidation by the phyllomanganate buserite. *Am. Mineral.* **1997**, *82*, (11-12), 1150-1175.
